# Supplementary material
Source: publisher site journal article supplement (https://www.spandidos-publications.com/2094/downloadSupplementary)
Supplement: Supplementary file 1 [file downloadSupplementary]

## Sheet: SNP_INDEL.HUMpjjX
Table S1. Summary of single nucleotide polymorphisms and InDels from thefour tumor samples.
Sample names	Chromosome	Position	Reference	Variation	Type
Patient 1	hbv	10	A	T	SNP
Patient 1	hbv	20	G	A	SNP
Patient 1	hbv	25	G	T	SNP
Patient 1	hbv	27	T	A	SNP
Patient 1	hbv	40	G	C	SNP
Patient 1	hbv	45	G	C	SNP
Patient 1	hbv	49	A	G	SNP
Patient 1	hbv	52	T	C	SNP
Patient 1	hbv	76	C	A	SNP
Patient 1	hbv	85	A	G	SNP
Patient 1	hbv	87	A	G	SNP
Patient 1	hbv	93	T	C	SNP
Patient 1	hbv	96	C	A	SNP
Patient 1	hbv	99	C	A	SNP
Patient 1	hbv	105	C	T	SNP
Patient 1	hbv	109	A	T	SNP
Patient 1	hbv	110	C	G	SNP
Patient 1	hbv	127	C	A	SNP
Patient 1	hbv	132	G	A	SNP
Patient 1	hbv	147	C	T	SNP
Patient 1	hbv	162	G	A	SNP
Patient 1	hbv	176	T	C	SNP
Patient 1	hbv	225	G	A	SNP
Patient 1	hbv	287	G	A	SNP
Patient 1	hbv	294	C	T	SNP
Patient 1	hbv	300	C	T	SNP
Patient 1	hbv	321	C	A	SNP
Patient 1	hbv	324	C	T	SNP
Patient 1	hbv	330	A	G	SNP
Patient 1	hbv	345	C	G	SNP
Patient 1	hbv	355	A	G	SNP
Patient 1	hbv	357	C	T	SNP
Patient 1	hbv	367	C	T	SNP
Patient 1	hbv	381	G	A	SNP
Patient 1	hbv	400	A	C	SNP
Patient 1	hbv	408	T	G	SNP
Patient 1	hbv	417	T	C	SNP
Patient 1	hbv	454	C	T	SNP
Patient 1	hbv	482	C	A	SNP
Patient 1	hbv	491	A	T	SNP
Patient 1	hbv	499	T	A	SNP
Patient 1	hbv	508	G	C	SNP
Patient 1	hbv	519	G	A	SNP
Patient 1	hbv	529	G	A	SNP
Patient 1	hbv	531	T	C	SNP
Patient 1	hbv	562	T	A	SNP
Patient 1	hbv	573	C	T	SNP
Patient 1	hbv	581	T	A	SNP
Patient 1	hbv	598	T	C	SNP
Patient 1	hbv	619	C	T	SNP
Patient 1	hbv	633	G	A	SNP
Patient 1	hbv	636	T	A	SNP
Patient 1	hbv	667	C	T	SNP
Patient 1	hbv	724	T	C	SNP
Patient 1	hbv	735	C	T	SNP
Patient 1	hbv	753	A	T	SNP
Patient 1	hbv	787	C	A	SNP
Patient 1	hbv	791	T	A	SNP
Patient 1	hbv	793	A	G	SNP
Patient 1	hbv	796	T	G	SNP
Patient 1	hbv	799	A	G	SNP
Patient 1	hbv	834	G	A	SNP
Patient 1	hbv	841	A	C	SNP
Patient 1	hbv	843	T	C	SNP
Patient 1	hbv	849	C	A	SNP
Patient 1	hbv	853	C	A	SNP
Patient 1	hbv	855	T	A	SNP
Patient 1	hbv	861	C	A	SNP
Patient 1	hbv	864	C	T	SNP
Patient 1	hbv	894	A	G	SNP
Patient 1	hbv	895	A	G	SNP
Patient 1	hbv	903	T	C	SNP
Patient 1	hbv	907	T	C	SNP
Patient 1	hbv	909	A	G	SNP
Patient 1	hbv	912	G	A	SNP
Patient 1	hbv	934	C	A	SNP
Patient 1	hbv	941	A	T	SNP
Patient 1	hbv	949	C	A	SNP
Patient 1	hbv	966	T	C	SNP
Patient 1	hbv	969	A	G	SNP
Patient 1	hbv	994	A	C	SNP
Patient 1	hbv	1014	C	G	SNP
Patient 1	hbv	1020	T	C	SNP
Patient 1	hbv	1029	T	C	SNP
Patient 1	hbv	1032	A	G	SNP
Patient 1	hbv	1041	C	A	SNP
Patient 1	hbv	1050	C	T	SNP
Patient 1	hbv	1053	G	A	SNP
Patient 1	hbv	1078	T	G	SNP
Patient 1	hbv	1080	T	A	SNP
Patient 1	hbv	1083	G	A	SNP
Patient 1	hbv	1085	A	T	SNP
Patient 1	hbv	1092	C	T	SNP
Patient 1	hbv	1122	G	A	SNP
Patient 1	hbv	1123	T	C	SNP
Patient 1	hbv	1126	A	C	SNP
Patient 1	hbv	1128	A	C	SNP
Patient 1	hbv	1131	A	G	SNP
Patient 1	hbv	1137	A	G	SNP
Patient 1	hbv	1155	C	T	SNP
Patient 1	hbv	1165	T	C	SNP
Patient 1	hbv	1167	A	T	SNP
Patient 1	hbv	1173	C	G	SNP
Patient 1	hbv	1203	G	T	SNP
Patient 1	hbv	1229	G	A	SNP
Patient 1	hbv	1252	G	T	SNP
Patient 1	hbv	1287	A	C	SNP
Patient 1	hbv	1306	C	A	SNP
Patient 1	hbv	1314	A	G	SNP
Patient 1	hbv	1317	G	A	SNP
Patient 1	hbv	1323	T	C	SNP
Patient 1	hbv	1329	A	G	SNP
Patient 1	hbv	1332	C	T	SNP
Patient 1	hbv	1338	C	T	SNP
Patient 1	hbv	1341	A	T	SNP
Patient 1	hbv	1344	T	C	SNP
Patient 1	hbv	1347	C	G	SNP
Patient 1	hbv	1353	T	C	SNP
Patient 1	hbv	1356	G	C	SNP
Patient 1	hbv	1368	C	A	SNP
Patient 1	hbv	1423	G	C	SNP
Patient 1	hbv	1425	C	T	SNP
Patient 1	hbv	1461	G	C	SNP
Patient 1	hbv	1464	T	C	SNP
Patient 1	hbv	1473	T	C	SNP
Patient 1	hbv	1479	C	G	SNP
Patient 1	hbv	1488	T	C	SNP
Patient 1	hbv	1491	C	G	SNP
Patient 1	hbv	1512	G	A	SNP
Patient 1	hbv	1544	T	A	SNP
Patient 1	hbv	1605	A	C	SNP
Patient 1	hbv	1626	G	A	SNP
Patient 1	hbv	1652	A	G	SNP
Patient 1	hbv	1655	C	T	SNP
Patient 1	hbv	1673	C	T	SNP
Patient 1	hbv	1719	T	G	SNP
Patient 1	hbv	1726	A	C	SNP
Patient 1	hbv	1727	A	T	SNP
Patient 1	hbv	1730	C	G	SNP
Patient 1	hbv	1741	T	C	SNP
Patient 1	hbv	1752	A	G	SNP
Patient 1	hbv	1762	A	T	SNP
Patient 1	hbv	1764	G	A	SNP
Patient 1	hbv	1799	C	G	SNP
Patient 1	hbv	1827	C	A	SNP
Patient 1	hbv	1896	G	A	SNP
Patient 1	hbv	1899	G	A	SNP
Patient 1	hbv	1913	C	A	SNP
Patient 1	hbv	1942	G	A	SNP
Patient 1	hbv	1943	T	C	SNP
Patient 1	hbv	1979	A	G	SNP
Patient 1	hbv	1984	A	C	SNP
Patient 1	hbv	2009	C	T	SNP
Patient 1	hbv	2059	A	G	SNP
Patient 1	hbv	2078	C	G	SNP
Patient 1	hbv	2088	G	T	SNP
Patient 1	hbv	2104	G	A	SNP
Patient 1	hbv	2134	C	T	SNP
Patient 1	hbv	2170	T	C	SNP
Patient 1	hbv	2178	T	C	SNP
Patient 1	hbv	2183	C	A	SNP
Patient 1	hbv	2191	T	C	SNP
Patient 1	hbv	2221	C	T	SNP
Patient 1	hbv	2228	T	G	SNP
Patient 1	hbv	2233	A	G	SNP
Patient 1	hbv	2245	C	T	SNP
Patient 1	hbv	2251	G	A	SNP
Patient 1	hbv	2281	C	T	SNP
Patient 1	hbv	2290	C	T	SNP
Patient 1	hbv	2293	T	A	SNP
Patient 1	hbv	2296	C	T	SNP
Patient 1	hbv	2304	C	A	SNP
Patient 1	hbv	2345	G	A	SNP
Patient 1	hbv	2354	C	A	SNP
Patient 1	hbv	2429	C	A	SNP
Patient 1	hbv	2444	C	T	SNP
Patient 1	hbv	2456	C	T	SNP
Patient 1	hbv	2465	T	A	SNP
Patient 1	hbv	2486	T	G	SNP
Patient 1	hbv	2504	T	G	SNP
Patient 1	hbv	2523	G	A	SNP
Patient 1	hbv	2525	T	A	SNP
Patient 1	hbv	2529	A	C	SNP
Patient 1	hbv	2537	C	T	SNP
Patient 1	hbv	2540	C	T	SNP
Patient 1	hbv	2546	T	G	SNP
Patient 1	hbv	2547	C	G	SNP
Patient 1	hbv	2558	A	G	SNP
Patient 1	hbv	2571	A	G	SNP
Patient 1	hbv	2574	A	G	SNP
Patient 1	hbv	2576	T	G	SNP
Patient 1	hbv	2590	A	T	SNP
Patient 1	hbv	2603	G	T	SNP
Patient 1	hbv	2609	T	A	SNP
Patient 1	hbv	2617	A	C	SNP
Patient 1	hbv	2618	A	C	SNP
Patient 1	hbv	2625	T	C	SNP
Patient 1	hbv	2631	T	C	SNP
Patient 1	hbv	2651	C	T	SNP
Patient 1	hbv	2657	T	C	SNP
Patient 1	hbv	2660	C	T	SNP
Patient 1	hbv	2661	C	G	SNP
Patient 1	hbv	2666	C	T	SNP
Patient 1	hbv	2681	G	A	SNP
Patient 1	hbv	2684	C	T	SNP
Patient 1	hbv	2690	C	G	SNP
Patient 1	hbv	2693	T	C	SNP
Patient 1	hbv	2708	T	A	SNP
Patient 1	hbv	2711	A	G	SNP
Patient 1	hbv	2712	T	C	SNP
Patient 1	hbv	2716	C	T	SNP
Patient 1	hbv	2733	A	C	SNP
Patient 1	hbv	2735	A	G	SNP
Patient 1	hbv	2738	T	G	SNP
Patient 1	hbv	2739	A	C	SNP
Patient 1	hbv	2741	G	A	SNP
Patient 1	hbv	2753	T	C	SNP
Patient 1	hbv	2759	G	T	SNP
Patient 1	hbv	2768	T	G	SNP
Patient 1	hbv	2771	C	G	SNP
Patient 1	hbv	2774	T	C	SNP
Patient 1	hbv	2789	A	G	SNP
Patient 1	hbv	2790	A	T	SNP
Patient 1	hbv	2792	T	C	SNP
Patient 1	hbv	2798	C	T	SNP
Patient 1	hbv	2813	T	C	SNP
Patient 1	hbv	2837	A	C	SNP
Patient 1	hbv	2840	G	T	SNP
Patient 1	hbv	2875	C	A	SNP
Patient 1	hbv	2889	G	A	SNP
Patient 1	hbv	2901	T	C	SNP
Patient 1	hbv	2910	T	C	SNP
Patient 1	hbv	2922	T	C	SNP
Patient 1	hbv	2931	C	T	SNP
Patient 1	hbv	2946	G	A	SNP
Patient 1	hbv	2950	G	A	SNP
Patient 1	hbv	2951	G	A	SNP
Patient 1	hbv	2962	A	G	SNP
Patient 1	hbv	2964	C	A	SNP
Patient 1	hbv	2980	T	C	SNP
Patient 1	hbv	2997	T	C	SNP
Patient 1	hbv	2998	C	A	SNP
Patient 1	hbv	3006	A	G	SNP
Patient 1	hbv	3009	G	C	SNP
Patient 1	hbv	3012	A	C	SNP
Patient 1	hbv	3021	A	G	SNP
Patient 1	hbv	3026	C	T	SNP
Patient 1	hbv	3036	T	C	SNP
Patient 1	hbv	3039	T	G	SNP
Patient 1	hbv	3054	A	T	SNP
Patient 1	hbv	3057	A	C	SNP
Patient 1	hbv	3060	C	T	SNP
Patient 1	hbv	3063	A	G	SNP
Patient 1	hbv	3066	C	A	SNP
Patient 1	hbv	3069	T	G	SNP
Patient 1	hbv	3100	T	C	SNP
Patient 1	hbv	3102	G	C	SNP
Patient 1	hbv	3108	A	T	SNP
Patient 1	hbv	3109	C	G	SNP
Patient 1	hbv	3120	A	T	SNP
Patient 1	hbv	3156	A	G	SNP
Patient 1	hbv	3169	A	T	SNP
Patient 1	hbv	3171	C	A	SNP
Patient 1	hbv	3186	A	G	SNP
Patient 1	hbv	3191	G	C	SNP
Patient 1	hbv	291	CCA	C	DEL
Patient 1	hbv	298	T	TAA	INS
Patient 1	hbv	938	AGC	A	DEL
Patient 1	hbv	942	A	ATG	INS
Patient 1	hbv	956	TG	T	DEL
Patient 1	hbv	1358	A	AGT	INS
Patient 1	hbv	1363	ACC	A	DEL
Patient 1	hbv	1630	ACC	A	DEL
Patient 1	hbv	1631	C	CGGGAA	INS
Patient 1	hbv	1632	C	CCTGCCCA	INS
Patient 1	hbv	1773	C	CTAGTTAATCAT	INS
Patient 1	hbv	2543	T	TC	INS
Patient 1	hbv	2599	CT	C	DEL
Patient 2	hbv	10	A	T	SNP
Patient 2	hbv	20	G	A	SNP
Patient 2	hbv	25	G	T	SNP
Patient 2	hbv	27	T	A	SNP
Patient 2	hbv	40	G	C	SNP
Patient 2	hbv	45	G	C	SNP
Patient 2	hbv	49	A	G	SNP
Patient 2	hbv	52	T	C	SNP
Patient 2	hbv	76	C	A	SNP
Patient 2	hbv	85	A	G	SNP
Patient 2	hbv	87	A	G	SNP
Patient 2	hbv	93	T	C	SNP
Patient 2	hbv	96	C	A	SNP
Patient 2	hbv	99	C	A	SNP
Patient 2	hbv	105	C	T	SNP
Patient 2	hbv	109	A	T	SNP
Patient 2	hbv	110	C	G	SNP
Patient 2	hbv	127	C	A	SNP
Patient 2	hbv	132	G	A	SNP
Patient 2	hbv	147	C	T	SNP
Patient 2	hbv	162	G	A	SNP
Patient 2	hbv	176	T	C	SNP
Patient 2	hbv	225	G	A	SNP
Patient 2	hbv	287	G	A	SNP
Patient 2	hbv	293	A	G	SNP
Patient 2	hbv	294	C	T	SNP
Patient 2	hbv	300	C	T	SNP
Patient 2	hbv	321	C	A	SNP
Patient 2	hbv	324	C	T	SNP
Patient 2	hbv	330	A	G	SNP
Patient 2	hbv	345	C	G	SNP
Patient 2	hbv	357	C	T	SNP
Patient 2	hbv	367	C	T	SNP
Patient 2	hbv	400	A	C	SNP
Patient 2	hbv	408	T	G	SNP
Patient 2	hbv	454	C	T	SNP
Patient 2	hbv	482	C	A	SNP
Patient 2	hbv	491	A	T	SNP
Patient 2	hbv	499	T	G	SNP
Patient 2	hbv	508	G	C	SNP
Patient 2	hbv	511	A	C	SNP
Patient 2	hbv	519	G	A	SNP
Patient 2	hbv	529	G	A	SNP
Patient 2	hbv	531	T	C	SNP
Patient 2	hbv	562	T	A	SNP
Patient 2	hbv	581	T	A	SNP
Patient 2	hbv	598	T	C	SNP
Patient 2	hbv	619	C	T	SNP
Patient 2	hbv	633	G	A	SNP
Patient 2	hbv	636	T	A	SNP
Patient 2	hbv	667	C	T	SNP
Patient 2	hbv	724	T	C	SNP
Patient 2	hbv	735	C	T	SNP
Patient 2	hbv	753	A	T	SNP
Patient 2	hbv	791	T	A	SNP
Patient 2	hbv	793	A	G	SNP
Patient 2	hbv	796	T	G	SNP
Patient 2	hbv	799	A	G	SNP
Patient 2	hbv	834	G	A	SNP
Patient 2	hbv	841	A	C	SNP
Patient 2	hbv	843	T	C	SNP
Patient 2	hbv	849	C	A	SNP
Patient 2	hbv	853	C	A	SNP
Patient 2	hbv	855	T	A	SNP
Patient 2	hbv	861	C	A	SNP
Patient 2	hbv	864	C	T	SNP
Patient 2	hbv	894	A	G	SNP
Patient 2	hbv	903	T	C	SNP
Patient 2	hbv	906	T	A	SNP
Patient 2	hbv	909	A	G	SNP
Patient 2	hbv	912	G	A	SNP
Patient 2	hbv	934	C	A	SNP
Patient 2	hbv	966	T	C	SNP
Patient 2	hbv	969	A	G	SNP
Patient 2	hbv	994	A	C	SNP
Patient 2	hbv	1050	C	T	SNP
Patient 2	hbv	1053	G	A	SNP
Patient 2	hbv	1078	T	G	SNP
Patient 2	hbv	1080	T	A	SNP
Patient 2	hbv	1083	G	A	SNP
Patient 2	hbv	1092	C	T	SNP
Patient 2	hbv	1131	A	G	SNP
Patient 2	hbv	1137	A	G	SNP
Patient 2	hbv	1155	C	T	SNP
Patient 2	hbv	1161	A	G	SNP
Patient 2	hbv	1165	T	C	SNP
Patient 2	hbv	1167	A	T	SNP
Patient 2	hbv	1173	C	G	SNP
Patient 2	hbv	1203	G	T	SNP
Patient 2	hbv	1218	C	T	SNP
Patient 2	hbv	1221	A	T	SNP
Patient 2	hbv	1229	G	A	SNP
Patient 2	hbv	1242	A	C	SNP
Patient 2	hbv	1252	G	T	SNP
Patient 2	hbv	1287	A	C	SNP
Patient 2	hbv	1306	C	A	SNP
Patient 2	hbv	1314	A	G	SNP
Patient 2	hbv	1317	G	A	SNP
Patient 2	hbv	1323	T	C	SNP
Patient 2	hbv	1329	A	G	SNP
Patient 2	hbv	1332	C	T	SNP
Patient 2	hbv	1338	C	T	SNP
Patient 2	hbv	1341	A	T	SNP
Patient 2	hbv	1344	T	C	SNP
Patient 2	hbv	1347	C	G	SNP
Patient 2	hbv	1353	T	C	SNP
Patient 2	hbv	1356	G	C	SNP
Patient 2	hbv	1359	A	G	SNP
Patient 2	hbv	1365	C	A	SNP
Patient 2	hbv	1425	C	T	SNP
Patient 2	hbv	1461	G	C	SNP
Patient 2	hbv	1464	T	C	SNP
Patient 2	hbv	1473	T	C	SNP
Patient 2	hbv	1479	C	T	SNP
Patient 2	hbv	1488	T	C	SNP
Patient 2	hbv	1491	C	G	SNP
Patient 2	hbv	1499	A	G	SNP
Patient 2	hbv	1508	T	A	SNP
Patient 2	hbv	1512	G	A	SNP
Patient 2	hbv	1544	T	A	SNP
Patient 2	hbv	1605	A	C	SNP
Patient 2	hbv	1652	A	G	SNP
Patient 2	hbv	1655	C	T	SNP
Patient 2	hbv	1673	C	T	SNP
Patient 2	hbv	1719	T	G	SNP
Patient 2	hbv	1726	A	C	SNP
Patient 2	hbv	1727	A	T	SNP
Patient 2	hbv	1730	C	G	SNP
Patient 2	hbv	1752	A	G	SNP
Patient 2	hbv	1773	C	T	SNP
Patient 2	hbv	1799	C	G	SNP
Patient 2	hbv	1827	C	A	SNP
Patient 2	hbv	2059	A	G	SNP
Patient 2	hbv	2104	G	A	SNP
Patient 2	hbv	2134	C	T	SNP
Patient 2	hbv	2159	A	G	SNP
Patient 2	hbv	2170	T	C	SNP
Patient 2	hbv	2191	T	C	SNP
Patient 2	hbv	2221	C	T	SNP
Patient 2	hbv	2233	A	G	SNP
Patient 2	hbv	2245	C	T	SNP
Patient 2	hbv	2251	G	A	SNP
Patient 2	hbv	2290	C	T	SNP
Patient 2	hbv	2293	T	A	SNP
Patient 2	hbv	2296	C	T	SNP
Patient 2	hbv	2354	C	A	SNP
Patient 2	hbv	2456	C	T	SNP
Patient 2	hbv	2465	T	A	SNP
Patient 2	hbv	2486	T	G	SNP
Patient 2	hbv	2504	T	G	SNP
Patient 2	hbv	2523	G	A	SNP
Patient 2	hbv	2525	T	A	SNP
Patient 2	hbv	2529	A	C	SNP
Patient 2	hbv	2537	C	T	SNP
Patient 2	hbv	2540	C	T	SNP
Patient 2	hbv	2547	C	G	SNP
Patient 2	hbv	2558	A	G	SNP
Patient 2	hbv	2560	A	G	SNP
Patient 2	hbv	2571	A	G	SNP
Patient 2	hbv	2574	A	G	SNP
Patient 2	hbv	2590	A	T	SNP
Patient 2	hbv	2603	G	T	SNP
Patient 2	hbv	2609	T	A	SNP
Patient 2	hbv	2618	A	C	SNP
Patient 2	hbv	2625	T	C	SNP
Patient 2	hbv	2651	C	T	SNP
Patient 2	hbv	2657	T	C	SNP
Patient 2	hbv	2660	C	T	SNP
Patient 2	hbv	2661	C	G	SNP
Patient 2	hbv	2666	C	T	SNP
Patient 2	hbv	2681	G	A	SNP
Patient 2	hbv	2684	C	T	SNP
Patient 2	hbv	2690	C	G	SNP
Patient 2	hbv	2693	T	C	SNP
Patient 2	hbv	2708	T	A	SNP
Patient 2	hbv	2711	A	G	SNP
Patient 2	hbv	2716	C	T	SNP
Patient 2	hbv	2733	A	C	SNP
Patient 2	hbv	2735	A	G	SNP
Patient 2	hbv	2738	T	G	SNP
Patient 2	hbv	2739	A	C	SNP
Patient 2	hbv	2741	G	A	SNP
Patient 2	hbv	2753	T	C	SNP
Patient 2	hbv	2759	G	T	SNP
Patient 2	hbv	2768	T	G	SNP
Patient 2	hbv	2771	C	G	SNP
Patient 2	hbv	2783	G	A	SNP
Patient 2	hbv	2789	A	G	SNP
Patient 2	hbv	2790	A	T	SNP
Patient 2	hbv	2792	T	C	SNP
Patient 2	hbv	2798	C	T	SNP
Patient 2	hbv	2813	T	C	SNP
Patient 2	hbv	2840	G	T	SNP
Patient 2	hbv	2875	C	A	SNP
Patient 2	hbv	2889	G	A	SNP
Patient 2	hbv	2901	T	C	SNP
Patient 2	hbv	2910	T	C	SNP
Patient 2	hbv	2922	T	C	SNP
Patient 2	hbv	2931	C	T	SNP
Patient 2	hbv	2946	G	A	SNP
Patient 2	hbv	2950	G	A	SNP
Patient 2	hbv	2951	G	A	SNP
Patient 2	hbv	2980	T	C	SNP
Patient 2	hbv	3006	A	G	SNP
Patient 2	hbv	3009	G	C	SNP
Patient 2	hbv	3012	A	C	SNP
Patient 2	hbv	3021	A	G	SNP
Patient 2	hbv	3026	C	T	SNP
Patient 2	hbv	3036	T	C	SNP
Patient 2	hbv	3039	T	G	SNP
Patient 2	hbv	3054	A	T	SNP
Patient 2	hbv	3057	A	C	SNP
Patient 2	hbv	3060	C	T	SNP
Patient 2	hbv	3063	A	G	SNP
Patient 2	hbv	3066	C	A	SNP
Patient 2	hbv	3069	T	G	SNP
Patient 2	hbv	3097	A	C	SNP
Patient 2	hbv	3120	A	T	SNP
Patient 2	hbv	3156	A	G	SNP
Patient 2	hbv	938	AGC	A	DEL
Patient 2	hbv	942	A	ATG	INS
Patient 2	hbv	1358	A	AGT	INS
Patient 2	hbv	1630	AC	A	DEL
Patient 2	hbv	1635	G	GA	INS
Patient 3	hbv	109	A	G	SNP
Patient 3	hbv	162	G	A	SNP
Patient 3	hbv	357	C	T	SNP
Patient 3	hbv	393	T	C	SNP
Patient 3	hbv	447	T	G	SNP
Patient 3	hbv	519	G	A	SNP
Patient 3	hbv	633	G	A	SNP
Patient 3	hbv	705	T	C	SNP
Patient 3	hbv	735	C	T	SNP
Patient 3	hbv	867	C	T	SNP
Patient 3	hbv	909	A	G	SNP
Patient 3	hbv	915	G	A	SNP
Patient 3	hbv	921	T	C	SNP
Patient 3	hbv	934	C	A	SNP
Patient 3	hbv	957	G	A	SNP
Patient 3	hbv	963	A	C	SNP
Patient 3	hbv	1041	C	T	SNP
Patient 3	hbv	1203	G	T	SNP
Patient 3	hbv	1206	T	A	SNP
Patient 3	hbv	1229	G	A	SNP
Patient 3	hbv	1270	A	T	SNP
Patient 3	hbv	1281	C	T	SNP
Patient 3	hbv	1341	A	T	SNP
Patient 3	hbv	1386	C	G	SNP
Patient 3	hbv	1474	T	C	SNP
Patient 3	hbv	1476	G	A	SNP
Patient 3	hbv	1479	C	A	SNP
Patient 3	hbv	1497	T	G	SNP
Patient 3	hbv	1515	G	A	SNP
Patient 3	hbv	1605	A	C	SNP
Patient 3	hbv	1613	G	A	SNP
Patient 3	hbv	1653	C	T	SNP
Patient 3	hbv	1655	C	T	SNP
Patient 3	hbv	1674	T	C	SNP
Patient 3	hbv	1719	T	G	SNP
Patient 3	hbv	1762	A	T	SNP
Patient 3	hbv	1764	G	A	SNP
Patient 3	hbv	1827	C	A	SNP
Patient 3	hbv	1896	G	A	SNP
Patient 3	hbv	2159	A	G	SNP
Patient 3	hbv	2183	C	A	SNP
Patient 3	hbv	2189	A	C	SNP
Patient 3	hbv	2191	T	C	SNP
Patient 3	hbv	2221	C	T	SNP
Patient 3	hbv	2245	C	T	SNP
Patient 3	hbv	2489	G	A	SNP
Patient 3	hbv	2525	T	G	SNP
Patient 3	hbv	2529	A	C	SNP
Patient 3	hbv	2549	C	T	SNP
Patient 3	hbv	2594	G	A	SNP
Patient 3	hbv	2603	G	T	SNP
Patient 3	hbv	2705	T	C	SNP
Patient 3	hbv	2712	T	A	SNP
Patient 3	hbv	2795	A	T	SNP
Patient 3	hbv	2798	C	T	SNP
Patient 3	hbv	2810	T	C	SNP
Patient 3	hbv	2848	A	C	SNP
Patient 3	hbv	2875	C	A	SNP
Patient 3	hbv	2904	C	A	SNP
Patient 3	hbv	2943	T	G	SNP
Patient 3	hbv	3036	T	C	SNP
Patient 3	hbv	3039	T	G	SNP
Patient 3	hbv	3063	A	C	SNP
Patient 3	hbv	3066	C	T	SNP
Patient 3	hbv	3109	C	G	SNP
Patient 3	hbv	3115	G	A	SNP
Patient 3	hbv	3135	C	A	SNP
Patient 3	hbv	3207	G	A	SNP
Patient 3	hbv	1122	GTGTAAA	G	DEL
Patient 3	hbv	1129	CAATATCTAA	C	DEL
Patient 4	hbv	13	C	T	SNP
Patient 4	hbv	52	T	C	SNP
Patient 4	hbv	53	T	C	SNP
Patient 4	hbv	109	A	T	SNP
Patient 4	hbv	162	G	A	SNP
Patient 4	hbv	312	C	T	SNP
Patient 4	hbv	381	G	A	SNP
Patient 4	hbv	446	C	G	SNP
Patient 4	hbv	493	A	T	SNP
Patient 4	hbv	532	T	A	SNP
Patient 4	hbv	592	C	T	SNP
Patient 4	hbv	633	G	A	SNP
Patient 4	hbv	796	T	G	SNP
Patient 4	hbv	799	A	G	SNP
Patient 4	hbv	834	G	A	SNP
Patient 4	hbv	843	T	C	SNP
Patient 4	hbv	867	C	T	SNP
Patient 4	hbv	870	T	C	SNP
Patient 4	hbv	876	C	T	SNP
Patient 4	hbv	882	A	C	SNP
Patient 4	hbv	894	A	G	SNP
Patient 4	hbv	906	T	A	SNP
Patient 4	hbv	909	A	G	SNP
Patient 4	hbv	912	G	A	SNP
Patient 4	hbv	955	T	C	SNP
Patient 4	hbv	1009	T	C	SNP
Patient 4	hbv	1041	C	T	SNP
Patient 4	hbv	1047	T	C	SNP
Patient 4	hbv	1050	C	A	SNP
Patient 4	hbv	1053	G	A	SNP
Patient 4	hbv	1059	T	G	SNP
Patient 4	hbv	1077	A	C	SNP
Patient 4	hbv	1078	T	G	SNP
Patient 4	hbv	1123	T	C	SNP
Patient 4	hbv	1128	A	C	SNP
Patient 4	hbv	1137	A	G	SNP
Patient 4	hbv	1203	G	T	SNP
Patient 4	hbv	1206	T	A	SNP
Patient 4	hbv	1218	C	A	SNP
Patient 4	hbv	1219	A	C	SNP
Patient 4	hbv	1228	C	G	SNP
Patient 4	hbv	1229	G	A	SNP
Patient 4	hbv	1329	A	G	SNP
Patient 4	hbv	1332	C	T	SNP
Patient 4	hbv	1341	A	T	SNP
Patient 4	hbv	1464	T	G	SNP
Patient 4	hbv	1479	C	G	SNP
Patient 4	hbv	1480	C	A	SNP
Patient 4	hbv	1498	C	T	SNP
Patient 4	hbv	1499	A	G	SNP
Patient 4	hbv	1516	A	C	SNP
Patient 4	hbv	1605	A	C	SNP
Patient 4	hbv	1630	A	G	SNP
Patient 4	hbv	1637	C	A	SNP
Patient 4	hbv	1655	C	T	SNP
Patient 4	hbv	1679	A	G	SNP
Patient 4	hbv	1719	T	G	SNP
Patient 4	hbv	1762	A	T	SNP
Patient 4	hbv	1764	G	A	SNP
Patient 4	hbv	1827	C	A	SNP
Patient 4	hbv	1846	A	T	SNP
Patient 4	hbv	1896	G	A	SNP
Patient 4	hbv	1899	G	A	SNP
Patient 4	hbv	1915	G	A	SNP
Patient 4	hbv	1951	T	G	SNP
Patient 4	hbv	1984	A	T	SNP
Patient 4	hbv	2048	C	G	SNP
Patient 4	hbv	2059	A	T	SNP
Patient 4	hbv	2075	A	G	SNP
Patient 4	hbv	2077	T	A	SNP
Patient 4	hbv	2107	C	A	SNP
Patient 4	hbv	2158	C	A	SNP
Patient 4	hbv	2189	A	C	SNP
Patient 4	hbv	2191	T	C	SNP
Patient 4	hbv	2209	T	C	SNP
Patient 4	hbv	2221	C	T	SNP
Patient 4	hbv	2245	C	T	SNP
Patient 4	hbv	2284	T	G	SNP
Patient 4	hbv	2342	G	A	SNP
Patient 4	hbv	2345	G	A	SNP
Patient 4	hbv	2410	G	A	SNP
Patient 4	hbv	2442	C	A	SNP
Patient 4	hbv	2443	T	C	SNP
Patient 4	hbv	2525	T	G	SNP
Patient 4	hbv	2529	A	C	SNP
Patient 4	hbv	2558	A	G	SNP
Patient 4	hbv	2564	G	A	SNP
Patient 4	hbv	2573	T	C	SNP
Patient 4	hbv	2582	T	C	SNP
Patient 4	hbv	2603	G	C	SNP
Patient 4	hbv	2612	T	C	SNP
Patient 4	hbv	2681	G	A	SNP
Patient 4	hbv	2684	C	T	SNP
Patient 4	hbv	2699	G	T	SNP
Patient 4	hbv	2712	T	C	SNP
Patient 4	hbv	2732	C	T	SNP
Patient 4	hbv	2741	G	A	SNP
Patient 4	hbv	2875	C	A	SNP
Patient 4	hbv	2898	T	A	SNP
Patient 4	hbv	2945	C	T	SNP
Patient 4	hbv	2958	C	T	SNP
Patient 4	hbv	3000	C	T	SNP
Patient 4	hbv	3008	A	C	SNP
Patient 4	hbv	3036	T	C	SNP
Patient 4	hbv	3039	T	G	SNP
Patient 4	hbv	3051	C	T	SNP
Patient 4	hbv	3057	A	C	SNP
Patient 4	hbv	3066	C	T	SNP
Patient 4	hbv	3084	T	G	SNP
Patient 4	hbv	3090	T	G	SNP
Patient 4	hbv	3109	C	G	SNP
Patient 4	hbv	3120	A	G	SNP
Patient 4	hbv	3171	C	T	SNP
Patient 4	hbv	1316	CG	C	DEL
Patient 4	hbv	1321	C	CA	INS
